# Supplementary material for: Diurnal variations in oxygen and nitrogen isotopes of atmospheric nitrogen dioxide and nitrate: implications for tracing NO x oxidation pathways and emission sources
Source: Copernicus journal article supplement (doi:10.5194/acp-24-1361-2024), 2024-01-30
Supplement: Supplementary file 1 [file acp-24-1361-2024-supplement.pdf]

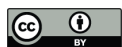

*Supplement of*

**Diurnal variations in oxygen and nitrogen isotopes of atmospheric nitrogen dioxide and nitrate: implications for tracing NO<sub>x</sub> oxidation pathways and emission sources**

**Sarah Albertin et al.**

*Correspondence to:* Sarah Albertin ([sarah.albertin@univ-grenoble-alpes.fr](mailto:sarah.albertin@univ-grenoble-alpes.fr))

The copyright of individual parts of the supplement might differ from the article licence.

## S1. NO<sub>2</sub> photolysis rate

The NO<sub>2</sub> photolysis rate ( $J_{\text{NO}_2}$ ) was calculated for the sampling periods using a boxmodel (CiTTYCAT version 2.02; Pugh et al., 2012) with the Fast-J photolysis scheme of Wild et al. (2000). The surface albedo (SA) was fixed to 0.65 which is between fresh-snow and old-snow albedo (Gardner and Sharp, 2010). Calculated  $J_{\text{NO}_2}$  was not constrained with cloud coverage which could induce overestimations. Based on visual observations, weather conditions during the two sampling periods (SP 1 and SP 2) were very stable with no cloud cover, whereas clouds were observed from February 22 to 23. To assess cloud cover and its effect on  $J_{\text{NO}_2}$  more quantitatively, we used direct shortwave radiation data (Dir\_SWdown in W m<sup>-2</sup>) from the S2M (SAFRAN–SURFEX/ISBA–Crocus–MEPRA; Vernay et al., 2022) reanalysis (open access dataset at <https://doi.org/10.25326/37#v2020.2>). Figure S1 shows the sensitivity of Dir\_SWdown to the presence of clouds from February 22 to 23 while on February 20, 21, 24 and 25 Dir\_SWdown values are higher and reproducible. This comparison confirms the representativeness of  $J_{\text{NO}_2}$  values calculated during SP1 and SP2 with respect to meteorological conditions.

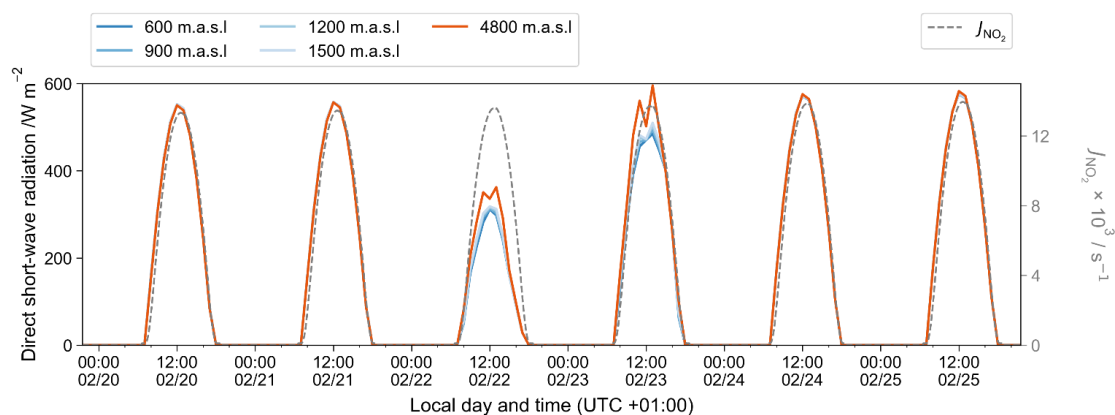

**Figure S1.** Temporal evolution of the direct short wave radiation (solid colored line) from the S2M (SAFRAN–SURFEX/ISBA–Crocus–MEPRA; Vernay et al., 2022) reanalysis at five altitudes from February 20<sup>th</sup> to February 25<sup>th</sup> in 2021 and of the NO<sub>2</sub> photolysis rate ( $J_{\text{NO}_2}$ , dashed grey line) from CiTTYCAT boxmodel output.

## S2. Atmospheric NO<sub>2</sub> isotopic data

| Sampling interval<br>(start – end) | Mean NO <sub>2</sub><br>/nmol mol <sup>-1</sup> | $\delta^{18}\text{O}(\text{NO}_2)$ /‰ | $\Delta^{17}\text{O}(\text{NO}_2)$ /‰ | $\delta^{15}\text{N}(\text{NO}_2)$ /‰ |
|------------------------------------|-------------------------------------------------|---------------------------------------|---------------------------------------|---------------------------------------|
| 19/02 21:00 – 20/02 00:30          | 19.5 ± 2.0                                      | 57.4 ± 0.9                            | 20.2 ± 0.3                            | -6.4 ± 0.3                            |
| 20/02 00:30 – 20/02 04:30          | 13.7 ± 1.8                                      | 54.9 ± 0.9                            | 19.9 ± 0.3                            | -9.0 ± 0.3                            |
| 20/02 04:30 – 20/02 07:30          | 23.2 ± 7.7                                      | 56.9 ± 0.9                            | 19.9 ± 0.3                            | -3.9 ± 0.3                            |
| 20/02 07:30 – 20/02 10:30          | 38.1 ± 6.6                                      | 86.9 ± 0.9                            | 29.4 ± 0.3                            | 7.2 ± 0.3                             |
| 20/02 10:30 – 20/02 13:30          | 29.1 ± 15.1                                     | 109.7 ± 0.9                           | 37.3 ± 0.3                            | 12.3 ± 0.3                            |
| 20/02 13:30 – 20/02 16:30          | 14.0 ± 13.0                                     | 112.3 ± 0.9                           | 40.8 ± 0.3                            | -0.7 ± 0.3                            |
| 20/02 16:30 – 20/02 18:00          | 50.1 ± 16.2                                     | 75.0 ± 0.9                            | 23.3 ± 0.3                            | 7.0 ± 0.3                             |
| 20/02 18:00 – 20/02 21:00          | 35.4 ± 10.3                                     | 61.8 ± 0.9                            | 22.1 ± 0.3                            | -3.6 ± 0.3                            |
| 24/02 07:30 – 24/02 10:30          | 41.7 ± 10.6                                     | 75.4 ± 0.9                            | 22.3 ± 0.3                            | 19.7 ± 0.3                            |
| 24/02 10:30 – 24/02 13:30          | 23.3 ± 21.9                                     | 105.5 ± 0.9                           | 35.0 ± 0.3                            | 16.5 ± 0.3                            |
| 24/02 13:30 – 24/02 16:30          | 4.5 ± 1.8                                       | 88.3 ± 8.8*                           | 34.4 ± 3.4*                           | -5.4 ± 0.3                            |
| 24/02 16:30 – 24/02 18:00          | 16.5 ± 9.6                                      | 61.7 ± 0.9                            | 20.9 ± 0.3                            | 1.2 ± 0.3                             |
| 24/02 18:00 – 24/02 21:00          | 33.6 ± 3.5                                      | 63.1 ± 0.9                            | 21.6 ± 0.3                            | -0.1 ± 0.3                            |
| 24/02 21:00 – 25/02 00:00          | 14.7 ± 8.2                                      | 57.3 ± 0.9                            | 20.0 ± 0.3                            | -5.2 ± 0.3                            |
| 25/02 00:00 – 25/02 04:00          | 8.1 ± 1.2                                       | 52.8 ± 0.9                            | 19.6 ± 0.3                            | -10.0 ± 0.3                           |
| 25/02 04:00 – 25/02 07:30          | 17.6 ± 15.5                                     | 55.8 ± 0.9                            | 20.1 ± 0.3                            | -1.5 ± 0.3                            |

**Table S1.** Summary table of: atmospheric NO<sub>2</sub> sampling periods, ambient NO<sub>2</sub> mixing ratio (mean ± standard deviation over the sampling period) and measurement of  $\delta^{18}\text{O}$ ,  $\Delta^{17}\text{O}$ , and  $\delta^{15}\text{N}$  in NO<sub>2</sub>. \*Sample corrected from a blank of 14.0 ‰ with an uncertainty of 10 ‰ and assuming a blank  $\Delta^{17}\text{O}$  at 0 ‰. Start and end datetimes (local time, UTC +01:00) represent when the denuder sample started and ended to be collected, respectively. All data represent the mean value over each sampling period. Uncertainty of  $\Delta^{17}\text{O}$  and  $\delta^{15}\text{N}$  data represents the accuracy of the analytical method (estimated as the standard deviation of the residuals between measurements of the reference materials and their expected values).

### S3. Atmospheric nitrate isotopic data

| Sampling interval<br>(start – end) | $\text{NO}_3^-$<br>/ $\mu\text{g m}^{-3}$ | $\delta^{18}\text{O}(\text{NO}_3^-)$<br>/‰ | $\Delta^{17}\text{O}(\text{NO}_3^-)$<br>/‰ | $\delta^{15}\text{N}(\text{NO}_3^-)$<br>/‰ |
|------------------------------------|-------------------------------------------|--------------------------------------------|--------------------------------------------|--------------------------------------------|
| 19/02 21:00 – 20/02 00:30          | 2.0                                       | $55.1 \pm 4.5$                             | $20.9 \pm 0.4$                             | $1.6 \pm 0.2$                              |
| 20/02 00:30 – 20/02 07:30          | 0.5                                       | $56.1 \pm 4.4$                             | $21.0 \pm 1.1$                             | $-0.3 \pm 0.2$                             |
| 20/02 07:30 – 20/02 10:30          | 1.4                                       | $54.6 \pm 3.8$                             | $18.3 \pm 0.5$                             | $12.0 \pm 0.1$                             |
| 20/02 10:30 – 20/02 13:30          | 1.1                                       | $62.5 \pm 3.6$                             | $21.5 \pm 0.1$                             | $14.9 \pm 0.1$                             |
| 20/02 13:30 – 20/02 16:30          | 0.4                                       | $67.2 \pm 2.2$                             | $26.1 \pm 0.4$                             | $-1.3 \pm 0.2$                             |
| 20/02 16:30 – 20/02 18:00          | 0.3                                       | $56.9 \pm 4.2$                             | $20.9 \pm 0.9$                             | $1.9 \pm 0.3$                              |
| 20/02 18:00 – 20/02 21:00          | 0.6                                       | $53.1 \pm 0.6$                             | $18.7 \pm 0.2$                             | $2.5 \pm 0.3$                              |
| 24/02 07:30 – 24/02 10:30          | 1.9                                       | $56.3 \pm 1.1$                             | $18.6 \pm 0.3$                             | $9.7 \pm 0.1$                              |
| 24/02 10:30 – 24/02 13:30          | 3.4                                       | $67.5 \pm 4.0$                             | $24.7 \pm 0.6$                             | $5.5 \pm 0.1$                              |
| 24/02 13:30 – 24/02 16:30          | 1.1                                       | $76.1 \pm 2.6$                             | $28.1 \pm 0.4$                             | $-3.8 \pm 1.1$                             |
| 24/02 16:30 – 24/02 18:00          | 0.9                                       | $74.2 \pm 1.2$                             | $27.2 \pm 0.1$                             | $-4.2 \pm 0.0$                             |
| 24/02 18:00 – 24/02 21:00          | 0.9                                       | $68.2 \pm 2.3$                             | $24.5 \pm 0.6$                             | $-1.4 \pm 0.1$                             |
| 24/02 21:00 – 25/02 00:00          | 0.9                                       | $63.9 \pm 1.3$                             | $22.2 \pm 0.5$                             | $-0.5 \pm 0.1$                             |
| 25/02 00:00 – 25/02 07:30          | 0.5                                       | $61.7 \pm 3.0$                             | $22.8 \pm 0.6$                             | $-1.5 \pm 0.1$                             |

**Table S2.** Summary table of: atmospheric  $\text{NO}_3^-$  sampling periods,  $\text{NO}_3^-$  mass concentration determined by ion chromatography and isotopic measurements ( $\delta^{18}\text{O}$ ,  $\Delta^{17}\text{O}$ , and  $\delta^{15}\text{N}$ ). Start and end datetimes (local time, UTC +01:00) represent when the filter sample started and ended to be collected, respectively. All data represent the mean value over each sampling period. Uncertainty of isotopic data represents the standard deviation of the residuals between the sample measurement and the mean value of triplicates. Uncertainty of the analytical protocol averaged at  $\pm 0.4$  ‰ and at  $\pm 0.3$  ‰ for  $\Delta^{17}\text{O}$  and  $\delta^{15}\text{N}$ , respectively.

#### S4. International isotopic reference materials

| Salt                                | Standard name        | $\delta^{17}\text{O}$ /‰ | $\delta^{18}\text{O}$ /‰ | $\Delta^{17}\text{O}$ /‰ | $\delta^{15}\text{N}$ /‰ |
|-------------------------------------|----------------------|--------------------------|--------------------------|--------------------------|--------------------------|
| NaNO <sub>3</sub>                   | USGS-35              | 51.5                     | 57.5                     | 21.6                     | 2.7                      |
| KNO <sub>3</sub> /NaNO <sub>3</sub> | USGS 34/35,<br>50:50 | 16.5                     | 12.5                     | 10.9                     | 0.3                      |
| KNO <sub>3</sub>                    | USGS-34              | -14.8                    | -27.9                    | -0.3                     | -1.8                     |
| KNO <sub>3</sub>                    | USGS-32              | 13.4                     | 25.7                     | 0                        | 180                      |
| KNO <sub>2</sub>                    | RSIL-N7373           |                          | 4.2                      |                          | -79.6                    |
| KNO <sub>2</sub>                    | RSIL-N10219          |                          | 88.5                     |                          | 2.8                      |
| KNO <sub>2</sub>                    | RSIL-N23             |                          | 11.4                     |                          | 3.7                      |

**Table S3.** International isotopic reference materials used to calibrate isotopic measurements of atmospheric NO<sub>2</sub> and NO<sub>3</sub><sup>-</sup> samples.

## S5. Ambient atmospheric observations in Chamonix

| Sampling interval<br>(start – end) | NO<br>/nmol mol <sup>-1</sup> | NO <sub>2</sub><br>/ nmol mol <sup>-1</sup> | O <sub>3</sub><br>/ nmol mol <sup>-1</sup> | PM <sub>10</sub><br>/ug m <sup>-3</sup> | PM <sub>2.5</sub><br>/ug m <sup>-3</sup> |
|------------------------------------|-------------------------------|---------------------------------------------|--------------------------------------------|-----------------------------------------|------------------------------------------|
| 19/02 21:00 – 20/02 00:30          | 0.7 ± 0.3                     | 19.5 ± 2.1                                  | 41 ± 1.5                                   | 28.7 ± 2.0                              | 22.8 ± 2.0                               |
| 20/02 00:30 – 20/02 04:30          | 0.2 ± 0.1                     | 13.7 ± 1.8                                  | 7.2 ± 0.7                                  | 21.2 ± 6.9                              | 17.4 ± 5.1                               |
| 20/02 04:30 – 20/02 07:30          | 3.7 ± 4.1                     | 23.3 ± 7.7                                  | 3.7 ± 2.1                                  | 9.0 ± 4.3                               | 6.9 ± 3.9                                |
| 20/02 07:30 – 20/02 10:30          | 32.8 ± 33.7                   | 38.1 ± 6.7                                  | 1.7 ± 0.4                                  | 14.0 ± 9.3                              | 10.9 ± 7.6                               |
| 20/02 10:30 – 20/02 13:30          | 31.2 ± 35.6                   | 29.2 ± 15.1                                 | 13.5 ± 11.9                                | 24.7 ± 11.5                             | 8.9 ± 8.1                                |
| 20/02 13:30 – 20/02 16:30          | 5.6 ± 6.6                     | 14.1 ± 13.1                                 | 28.8 ± 5.1                                 | 15.7 ± 9.3                              | 3.6 ± 1.7                                |
| 20/02 16:30 – 20/02 18:00          | 22.2 ± 6.5                    | 50.2 ± 16.3                                 | 13.7 ± 7.7                                 | 39.8 ± 10.2                             | 8.7 ± 2.5                                |
| 20/02 18:00 – 20/02 21:00          | 4.9 ± 5.3                     | 35.4 ± 10.4                                 | 2.9 ± 1.3                                  | 20.1 ± 2.8                              | 13.8 ± 2.0                               |
| 24/02 07:30 – 24/02 10:30          | 113.6 ± 53.5                  | 41.8 ± 10.6                                 | 0.5 ± 0.4                                  | 46.9 ± 5.8                              | 31.3 ± 3.9                               |
| 24/02 10:30 – 24/02 13:30          | 47.4 ± 70.4                   | 23.4 ± 22.0                                 | 13.9 ± 13.2                                | 90.9 ± 34.6                             | 33.5 ± 3.8                               |
| 24/02 13:30 – 24/02 16:30          | 1.3 ± 0.4                     | 4.6 ± 1.8                                   | 29.9 ± 0.8                                 | 114.5 ± 2.1                             | 37.6 ± 0.5                               |
| 24/02 16:30 – 24/02 18:00          | 4.8 ± 3.6                     | 16.5 ± 9.7                                  | 23.5 ± 6.2                                 | 127.0 ± 11.5                            | 38.5 ± 0.9                               |
| 24/02 18:00 – 24/02 21:00          | 8.2 ± 6.4                     | 33.6 ± 3.5                                  | 1.8 ± 1.2                                  | 53.7 ± 17.8                             | 31.9 ± 5.4                               |
| 24/02 21:00 – 25/02 00:00          | 1.1 ± 1.4                     | 14.8 ± 8.2                                  | 3.1 ± 2.7                                  | 53.4 ± 147                              | 35.7 ± 9.9                               |
| 25/02 00:00 – 25/02 04:00          | 0.1 ± 0.1                     | 8.1 ± 1.3                                   | 10.6 ± 3.7                                 | 31.0 ± 11.5                             | 20.7 ± 7.7                               |
| 25/02 04:00 – 25/02 07:30          | 6.2 ± 15.0                    | 17.6 ± 15.6                                 | 11.5 ± 5.6                                 | 17.9 ± 2.2                              | 12.0 ± 1.4                               |

**Table S4.** Summary of ambient atmospheric observations in Chamonix averaged over each denuder sampling period (mean value ± the standard deviation over the sampling period). Start and end datetimes (local time, UTC+01:00) represent when the denuder sample started and ended to be collected, respectively. Surface NO<sub>x</sub> mixing ratios were measured at the sampling site using an incoherent broadband cavity-enhanced absorption spectrometer for NO<sub>2</sub> (IBBCEAS; Barbero et al., 2020) and an optical-feedback cavity-enhanced absorption spectrometer for NO (OFCEAS; Richard et al., 2018). O<sub>3</sub> mixing ratio was monitored at the local air quality monitoring site located a kilometre north of the sampling site (Environnement SA<sup>®</sup>, O3 42M; <https://www.atmo-auvergnerhonealpes.fr/>, last access: 5 November 2021). Particulate matter (PM<sub>10</sub>, PM<sub>2.5</sub>) concentrations were monitored by an optical particle counter (GRIMM<sup>®</sup>, EDM 164).

## S6. Temperature, kinetic and isotopic equilibrium constants

| Sampling interval<br>(start – end) | $T_{\text{surface}} / \text{K}$ | $k_{\text{NO} + \text{O}_3} \times 10^{-14}$<br>$/\text{cm}^{-3} \text{mol}^{-1} \text{s}^{-1}$ | $\alpha_{\text{EIE}(\text{NO}_2/\text{NO})}$ | $\alpha_{\text{KIE}(\text{NO}+\text{O}_3)}$ |
|------------------------------------|---------------------------------|-------------------------------------------------------------------------------------------------|----------------------------------------------|---------------------------------------------|
| 19/02 21:00 – 20/02 00:30          | 274.6                           | 1.14                                                                                            | 1.045                                        | 0.994                                       |
| 20/02 00:30 – 20/02 04:30          | 272.7                           | 1.10                                                                                            | 1.046                                        | 0.994                                       |
| 20/02 04:30 – 20/02 07:30          | 271.6                           | 1.08                                                                                            | 1.046                                        | 0.994                                       |
| 20/02 07:30 – 20/02 10:30          | 271.0                           | 1.07                                                                                            | 1.046                                        | 0.994                                       |
| 20/02 10:30 – 20/02 13:30          | 274.6                           | 1.12                                                                                            | 1.045                                        | 0.994                                       |
| 20/02 13:30 – 20/02 16:30          | 287.5                           | 1.40                                                                                            | 1.042                                        | 0.994                                       |
| 20/02 16:30 – 20/02 18:00          | 288.3                           | 1.44                                                                                            | 1.042                                        | 0.994                                       |
| 20/02 18:00 – 20/02 21:00          | 280.3                           | 1.27                                                                                            | 1.044                                        | 0.994                                       |
| 24/02 07:30 – 24/02 10:30          | 274.0                           | 1.12                                                                                            | 1.045                                        | 0.994                                       |
| 24/02 10:30 – 24/02 13:30          | 279.4                           | 1.22                                                                                            | 1.044                                        | 0.994                                       |
| 24/02 13:30 – 24/02 16:30          | 289.3                           | 1.45                                                                                            | 1.041                                        | 0.994                                       |
| 24/02 16:30 – 24/02 18:00          | 289.2                           | 1.45                                                                                            | 1.042                                        | 0.994                                       |
| 24/02 18:00 – 24/02 21:00          | 284.2                           | 1.35                                                                                            | 1.043                                        | 0.994                                       |
| 24/02 21:00 – 25/02 00:00          | 278.3                           | 1.22                                                                                            | 1.044                                        | 0.994                                       |
| 25/02 00:00 – 25/02 04:00          | 277.1                           | 1.19                                                                                            | 1.044                                        | 0.994                                       |
| 25/02 04:00 – 25/02 07:30          | 276.2                           | 1.17                                                                                            | 1.045                                        | 0.994                                       |

**Table S5.** Summary table of measured surface temperature, calculated  $k_{\text{NO}+\text{O}_3}$ ,  $\alpha_{\text{EIE}(\text{NO}_2/\text{NO})}$  and  $\alpha_{\text{KIE}(\text{NO}+\text{O}_3)}$ .

## S7. Temperature profiles

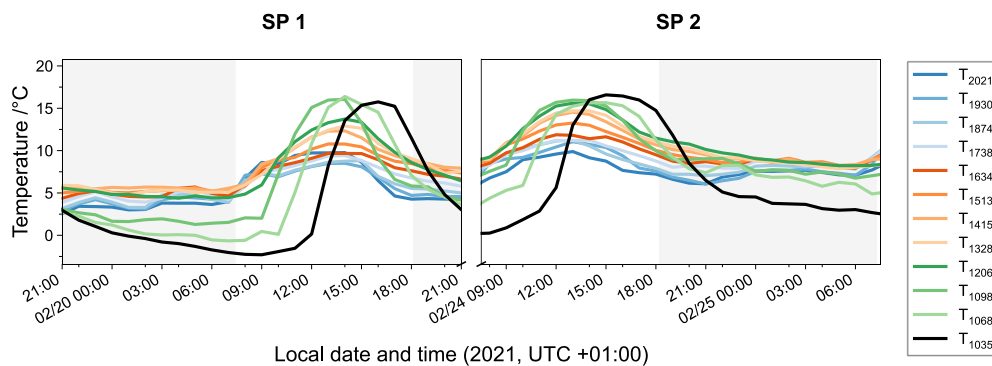

**Figure S2.** Temporal evolution of air temperature during the two sampling periods (February 19<sup>th</sup>–20<sup>th</sup> and February 24<sup>th</sup>–25<sup>th</sup>). The profiles are plotted using observations of 13 portable temperature loggers placed at two ground-based stations in Chamonix at 1035 m.a.s.l and at 1068 m.a.s.l and fixed along the Plan–Praz cable car (45°55'21.53" N, 6°52'11.68" E) from 1098 m.a.s.l to 2021 m.a.s.l.

## S8. Atmospheric observations in Chamonix in February 2021

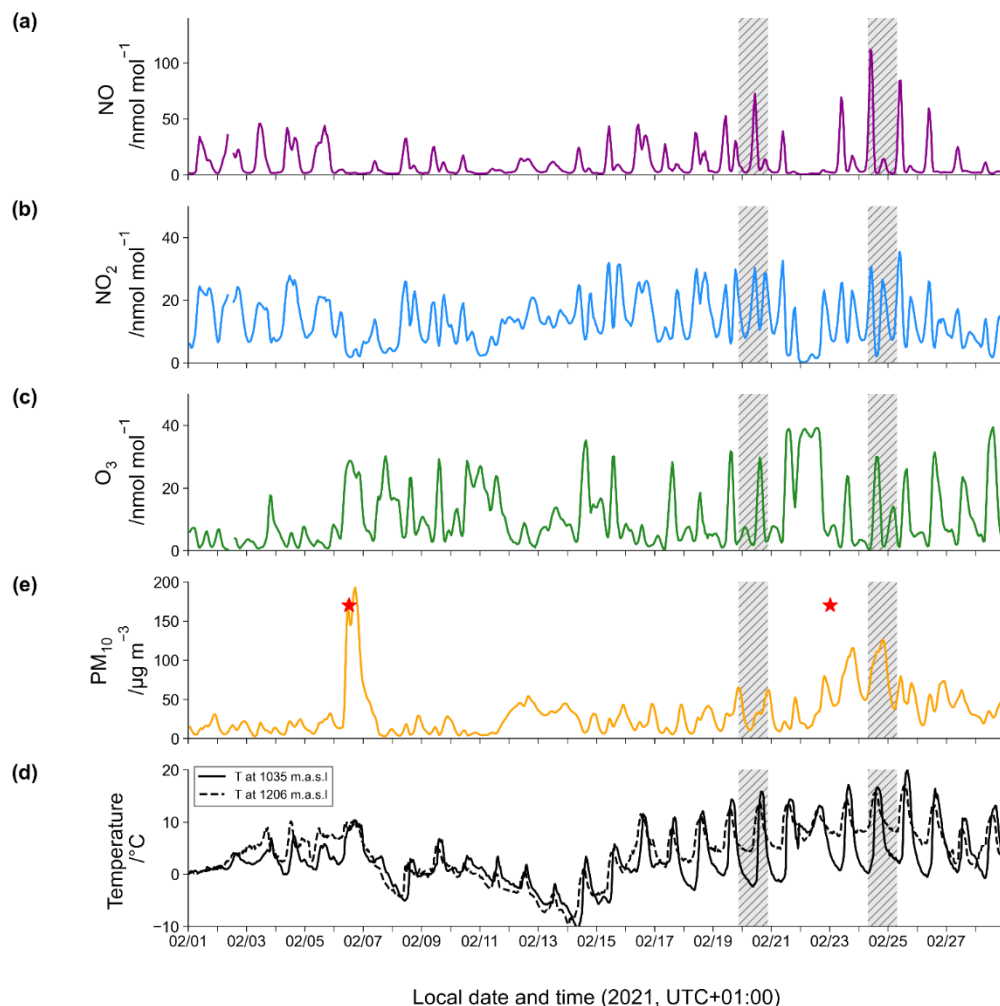

**Figure S3.** Temporal evolution in February 2021 in Chamonix of the hourly mean of (a) NO mixing ratio (purple line), (b) NO<sub>2</sub> mixing ratio (blue line), (c) O<sub>3</sub> mixing ratio (green line), (d) PM<sub>10</sub> mass concentration (orange line) and (e) temperature at the surface (black line) and at 1206 m.a.s.l (dashed black line). Saharan dust events that occurred in February 2021 are represented by the red stars. Grey shaded areas represent sampling periods for this study. Data provided by the air quality monitoring site (<https://www.atmo-auvergnerhonealpes.fr/>, last access: 5 November 2021).

## S9. Evidences of a Saharan dust event in Chamonix on February 24-25 2021

The NASA AQUA satellite images from MODIS show the formation of a dusty air mass above the Saharan region on 20 February and the displacement of this air mass in the following days to the south of France (Figure



S4). In addition, backtracking trajectory (HYSPLIT) allows to visualise the entrance in the Chamonix valley of air masses coming from the south on 24 February (Figure S3).

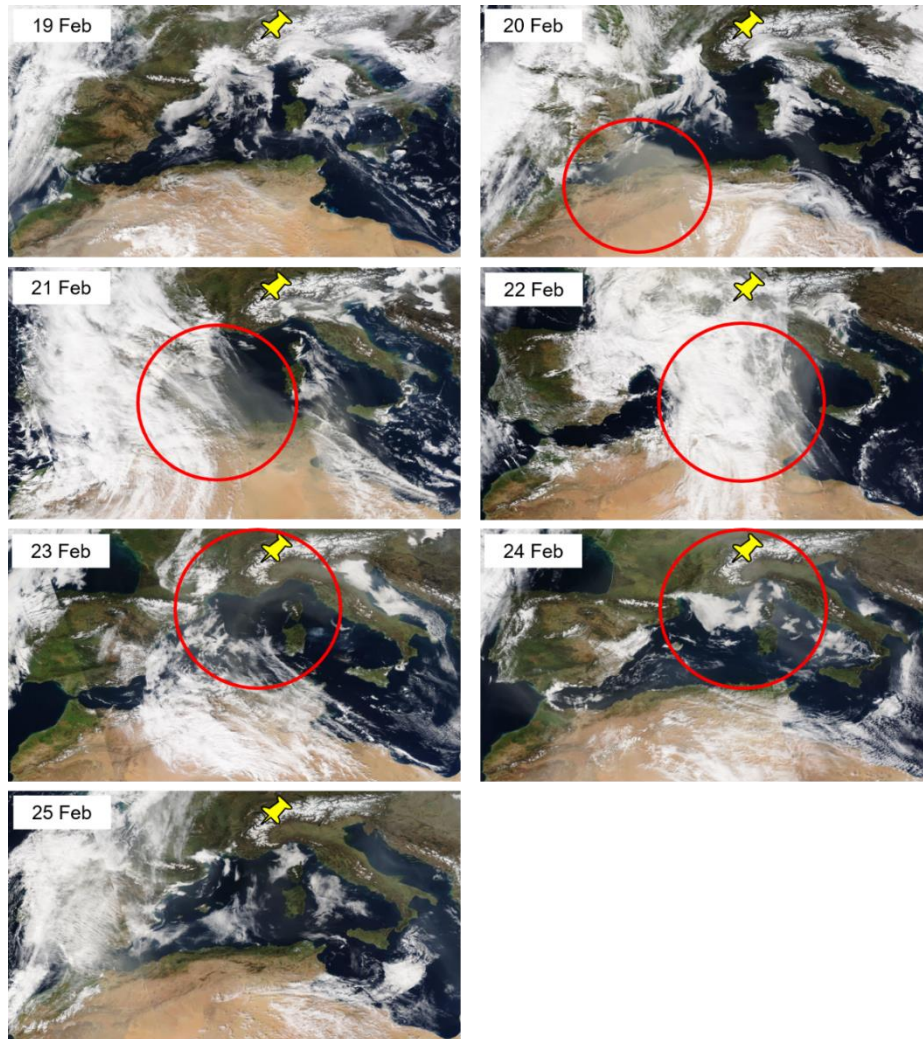

**Figure S4.** Images from the AQUA satellite (MODIS; © NASA) from 19 February 2021 to 25 February 2021. One can see a plume of Saharan dust forming over North Africa on 20 February (localised by the red circle) and moving above the south of France and the Alps until 24 February. The yellow pin points to Chamonix, France.

NOAA HYSPLIT MODEL  
Backward trajectory ending at 1200 UTC 24 Feb 21  
GDAS Meteorological Data

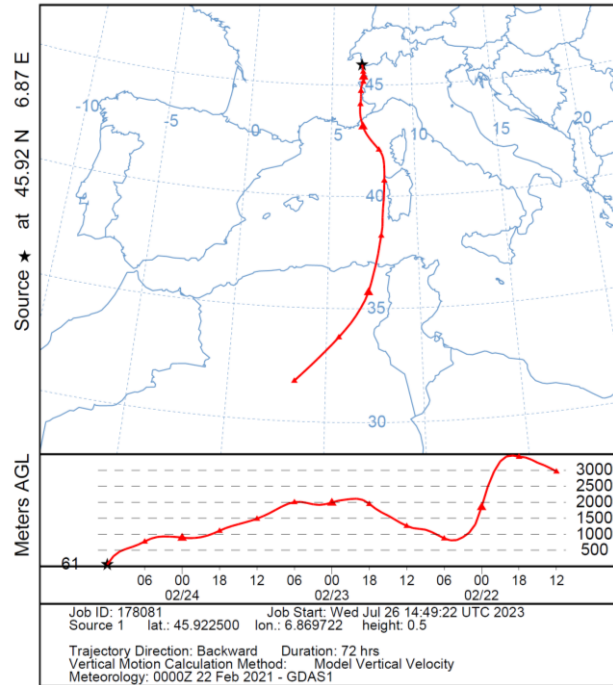

**Figure S5.** HYSPLIT 72 hours backward trajectory on 24 February 2021 ending at Chamonix, France, at 12:00 UTC (13:00 local time). The model was run every 6 hours. The starting height (in meter above ground level) is half of the boundary layer height estimated by the model from meteorological data set.
